# Supplementary material for: Association of Subthalamic Deep Brain Stimulation With Motor, Functional, and Pharmacologic Outcomes in Patients With Monogenic Parkinson Disease: A Systematic Review and Meta-analysis
Source: PubMed Central journal article supplement (PMC6484599; doi:10.1001/jamanetworkopen.2018.7800), 2019-02-01
Supplement: jamanetwopen-2-e187800-s001.pdf [file jamanetwopen-2-e187800-s001.pdf]

## Supplementary Online Content

Artusi CA, Dwivedi AK, Romagnolo A, et al. Association of subthalamic deep brain stimulation with motor, functional, and pharmacologic outcomes in patients with monogenic Parkinson disease: a systematic review and meta-analysis. *JAMA Netw Open*. 2019;2(2):e187800. doi: 10.1001/jamanetworkopen.2018.7800

**eFigure.** Percent Motor Improvement and Dopaminergic Dose Reduction Following STN DBS

**eTable 1.** Meta-analysis Data for Proportion

**eTable 2.** Meta-analysis Data for Motor and Therapy Endpoints

**eTable 3.** Case Report Data

**eTable 4.** Meta-analysis Output

**eTable 5.** Motor Levodopa Response

**eTable 6.** Heterozygous *PRKN* Analysis

**eTable 7.** Validation Analyses for UPDRS-III Improvement and LEDD Reduction

**eTable 8.** Pre STN DBS Motor Outcome (UPDRS-III Score) Associated With Levodopa - Meta-analysis

**eTable 9.** Pre STN DBS Motor Outcome (UPDRS-III Score) Associated With Levodopa - Intra-individual Patient Analysis

**eAppendix 1.** Statistical Codes

**eAppendix 2.** Methods of Data Analysis

This supplementary material has been provided by the authors to give readers additional information about their work.

**eFigure. Percent motor improvement and dopaminergic dose reduction following STN DBS**

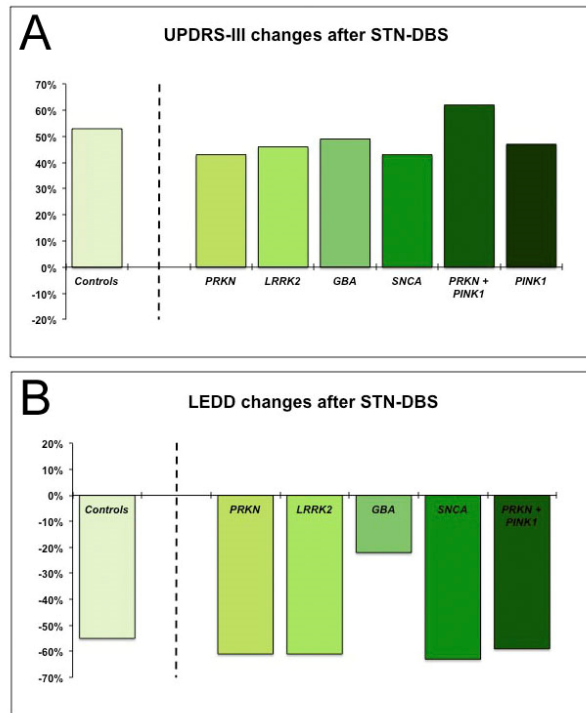

UPDRS: Unified Parkinson’s Disease Rating Scale; LEDD: Levodopa Equivalent Daily Dose  
STN-DBS: Subthalamic nucleus Deep brain stimulation  
LEDD: Levodopa Equivalent Daily Dose

Motor improvement (A), defined as the percentage change in the motor subscale (part III) of the Unified Parkinson’s Disease Rating Scale between the pre-surgical Medication-OFF condition and the post-surgical Medication-OFF/Stimulation-ON condition.  
Changes of dopaminergic dose (B), defined as the modification of LEDD between the pre-surgical assessment and the post-surgical follow-up.

**eTable 1. Meta-analysis data for proportion**

| <b>ID study</b> | <b>Authors</b>      | <b>Year</b> | <b>Study</b> | <b>Total sample size</b> | <b>Screened</b> | <b>Mutation</b> | <b>Parkin</b> | <b>Parkin heterozygous</b> | <b>LRRK2</b> | <b>PINK1</b> | <b>GBA</b> |
|-----------------|---------------------|-------------|--------------|--------------------------|-----------------|-----------------|---------------|----------------------------|--------------|--------------|------------|
| 1               | Moro et al          | 2008        | Cohort       | 312                      | 80              | 12              | 6             | 5                          |              | 1            |            |
| 2               | Angeli et al        | 2013        | Cohort       | 94                       | 93              | 19              | 2             |                            | 5            |              | 13         |
| 3               | Romito et al        | 2005        | Cohort       | 36                       | 36              | 5               | 1             | 4                          |              |              |            |
| 4               | Lohman et al        | 2008        | Cohort       | 134                      | 54              | 14              | 7             | 7                          |              |              |            |
| 6               | Kim et al           | 2014        | Cohort       | 122                      | 18              | 5               | 3             | 2                          |              |              |            |
| 7               | Schupbach et al     | 2007        | Cohort       | 69                       | 69              | 9               |               |                            | 9            |              |            |
| 8               | Greenbaum et al     | 2013        | Case-Control | 39                       |                 |                 |               |                            |              |              |            |
| 9               | Sayad et al         | 2016        | Cohort       | 27                       | 27              | 17              |               | 2                          | 15           |              |            |
| 11              | Lythe et al         | 2017        | Case-Control | 34                       |                 |                 |               |                            |              |              |            |
| 12              | Gomez-Esteban et al | 2006        | Case-Control | 48                       | 8               | 5               |               |                            | 5            |              |            |
| 13              | Weiss et al         | 2012        | Case-Control | 98                       | 98              | 3               |               |                            |              |              | 3          |

**eTable 2A. Meta-analysis data for motor and therapy endpoints**

| ID study | Study               | Unique study | Year | Study type   | Genes                           | Gene type | Target        | Total sample size | Age at onset | Disease duration at DBS | Follow-up months | Total genes |
|----------|---------------------|--------------|------|--------------|---------------------------------|-----------|---------------|-------------------|--------------|-------------------------|------------------|-------------|
| 1        | Moro et al (a)      | 1            | 2008 | Cohort       | PARKIN (homozygous)             | 1         | STN           | 80                | 26.5         | 22.17                   | 12               | 6           |
| 2        | Moro et al (b)      |              | 2008 | Cohort       | PARKIN (heterozygous)           | 2         | STN           | 80                | 34.4         | 15.6                    | 12               | 5           |
| 3        | Angeli et al (a)    | 1            | 2013 | Cohort       | PARKIN (homozygous), GBA, LRRK2 | 1         | STN, Gpi, Vim | 94                | 39.67        | 25.2                    | 12               | 2           |
| 4        | Romito et al        | 1            | 2005 | Cohort       | PARKIN (heterozygous)           | 2         | STN           | 36                | 33           | 15.7                    | 18               | 4           |
| 5        | Lohmann et al (a)   | 1            | 2008 | Cohort       | PARKIN (homozygous)             | 1         | STN           | 53                | 26.4         | 19.9                    | 18               | 7           |
| 6        | Lohmann et al (b)   |              | 2008 | Cohort       | PARKIN (heterozygous)           | 2         | STN           | 53                | 38.4         | 13.4                    | 18               | 7           |
| 7        | Kim et al           | 1            | 2014 | Cohort       | PARKIN (homozygous)             | 1         | STN           | 12                | 21.7         | 28.3                    | 45               | 3           |
| 8        | Schupbach et al     | 1            | 2007 | Cohort       | LRRK2                           | 3         | STN           | 69                | 41.1         | 13.4                    | 12               | 9           |
| 9        | Greenbaum et al     | 1            | 2013 | Case-Control | LRRK2                           | 3         | STN           | 39                | 49.5         | 11.7                    | 12               | 13          |
| 10       | Sayad et al (a)     | 1            | 2016 | Cohort       | LRRK2                           | 3         | STN           | 27                | 40.1         | 16.1                    | 24               | 15          |
| 11       | Sayad et al (b)     |              | 2016 | Cohort       | PARKIN (heterozygous)           | 2         | STN           | 27                | 48           | 11.5                    | 24               | 2           |
| 12       | Lythe et al         | 1            | 2017 | Case-Control | GBA                             | 4         | STN, Gpi      | 34                | 41.4         | 12.1                    | 90               | 17          |
| 13       | Angeli et al (b)    |              | 2013 | Cohort       | PARKIN (homozygous), GBA, LRRK2 | 3         | STN, Gpi, Vim | 94                | 43           | 12.8                    | 12               | 5           |
| 14       | Angeli et al (c)    |              | 2013 | Cohort       | PARKIN (homozygous), GBA, LRRK2 | 4         | STN, Gpi, Vim | 94                | 42.9         | 11.2                    | 12               | 16          |
| 15       | Gomez-Esteban et al | 1            | 2006 | Case-control | LRRK2                           | 3         | STN           | 8                 | 43.2         | 12.8                    | 6                | 4           |

|    |             |   |          |                  |     |   |     |    |      |       |    |   |
|----|-------------|---|----------|------------------|-----|---|-----|----|------|-------|----|---|
| 16 | Weiss et al | 1 | 201<br>2 | Case-<br>Control | GBA | 4 | STN | 98 | 49.7 | 17.33 | 36 | 3 |
|----|-------------|---|----------|------------------|-----|---|-----|----|------|-------|----|---|

STN: subthalamic nucleus  
 GPi: globus pallidus pars interna  
 Vim: nucleus ventralis intermedius  
 DBS: deep brain stimulation

**eTable 2B. Meta-analysis data for motor and therapy endpoints**

| ID study | Male mutated | Female mutated | Number of mutated patients | Presurgical UPDRS-III mutated | Presurgical UPDRS-III SD mutated | Postsurgical UPDRS-III mutated | Postsurgical UPDRS-III SD mutated | Number of controls | Male controls | Female controls | Age at onset controls | Disease duration controls | Presurgical UPDRS-III controls | Presurgical UPDRS-III SD controls | Postsurgical UPDRS-III controls | Postsurgical UPDRS-III SD controls |
|----------|--------------|----------------|----------------------------|-------------------------------|----------------------------------|--------------------------------|-----------------------------------|--------------------|---------------|-----------------|-----------------------|---------------------------|--------------------------------|-----------------------------------|---------------------------------|------------------------------------|
| 1        | 3            | 3              | 6                          | 49.2                          | 13.4                             | 36.2                           | 15.6                              | 68                 |               |                 |                       |                           |                                |                                   |                                 |                                    |
| 2        | 2            | 3              | 5                          | 50                            | 9.1                              | 30.7                           | 7.9                               | 68                 |               |                 | 3.3                   | 1.3                       | 48.7                           | 13.1                              | 21.5                            | 10.7                               |
| 3        |              |                | 2                          | 62.5                          | 3.5                              | 43                             | 0                                 | 67                 | 46            | 21              | 40.8                  | 15.1                      |                                |                                   |                                 |                                    |
| 4        | 3            | 1              | 4                          | 57                            | 10.55                            | 22.75                          | 9.6                               | 31                 | 17            | 14              | 43.5                  | 13.9                      | 59.7                           | 11.3                              | 29                              | 12.3                               |
| 5        |              |                | 7                          | 55.4                          | 17.3                             | 14.5                           | 12.5                              | 39                 |               |                 |                       |                           |                                |                                   |                                 |                                    |
| 6        |              |                | 7                          | 54.3                          | 13.9                             | 17.8                           | 11.2                              | 39                 |               |                 |                       |                           | 51.9                           | 18.3                              | 17.9                            | 15.1                               |
| 7        | 1            | 2              | 3                          | 49.8                          | 24.5                             | 24.7                           | 14                                | 9                  | 5             | 4               | 34.6                  | 15.4                      | 38.3                           | 10.6                              | 17.2                            | 5.5                                |
| 8        | 6            | 3              | 9                          | 41.4                          | 12.4                             | 17.8                           | 9.6                               | 60                 | 34            | 26              | 43.1                  | 13                        | 43.4                           | 17                                | 15.7                            | 9.9                                |
| 9        | 8            | 5              | 13                         | 42.5                          | 11.8                             | 28.5                           | 13.1                              | 26                 | 17            | 9               | 49.2                  | 13.2                      | 43.3                           | 12.3                              | 27.2                            | 14.1                               |
| 10       |              |                | 15                         | 55.8                          | 16.4                             | 27.3                           | 20.6                              | 12                 |               |                 | 40.3                  | 14.3                      | 51.7                           | 14.4                              | 38.5                            | 16.6                               |
| 11       | 2            |                | 2                          | 47.5                          | 2.1                              | 51                             | 0                                 | 12                 |               |                 |                       |                           |                                |                                   |                                 |                                    |
| 12       | 10           | 0              | 17                         | 52.4                          | 13                               | 18.4                           | 14.9                              | 17                 | 10            | 7               | 43                    | 14.7                      | 40.5                           | 12                                | 12.6                            | 7.4                                |
| 13       | 3            | 2              | 5                          | 65.4                          | 14.9                             | 30.6                           | 16.1                              | 67                 |               |                 |                       |                           |                                |                                   |                                 |                                    |
| 14       | 9            | 7              | 13                         | 50.5                          | 12.4                             | 28                             | 11.4                              | 67                 |               |                 |                       |                           |                                |                                   |                                 |                                    |
| 15       |              |                | 4                          | 48.5                          | 18.5                             | 39.7                           | 39.7                              | 43                 |               |                 | 58                    | 14.2                      |                                |                                   |                                 |                                    |
| 16       | 0            | 3              | 3                          | 18.7                          | 4.6                              | 17.3                           | 11.7                              | 6                  | 0             | 6               | 49.3                  | 17.8                      |                                |                                   | 18.3                            | 7.1                                |

UPDRS-III: unified parkinson's disease rating scale part III  
SD: standard deviation

**eTable 2C. Meta-analysis data for motor and therapy endpoints**

| ID study | Presurgical LEDD mutated | Presurgical LEDD SD mutated | Postsurgical LEDD mutated | Postsurgical LEDD SD mutated | Mean changed LEDD | SD changed LEDD | Presurgical LEDD controls | Presurgical LEDD SD controls | Postsurgical LEDD controls | Postsurgical LEDD SD controls |
|----------|--------------------------|-----------------------------|---------------------------|------------------------------|-------------------|-----------------|---------------------------|------------------------------|----------------------------|-------------------------------|
| 1        |                          |                             |                           |                              |                   |                 |                           |                              |                            |                               |
| 2        |                          |                             |                           |                              |                   |                 | 1286                      | 655.6                        | 722                        | 563.2                         |
| 3        | 960                      | 611                         | 940                       | 611                          | 20                | 594             |                           |                              |                            |                               |
| 4        | 1366                     | 294                         | 295                       | 106                          |                   |                 | 1306                      | 692                          | 591.2                      | 431.6                         |
| 5        | 1091                     | 207                         | 193                       | 108                          |                   |                 |                           |                              |                            |                               |
| 6        | 1089                     | 317                         | 293                       | 196                          |                   |                 | 1355                      | 732                          | 534                        | 439                           |
| 7        | 460                      | 151                         | 141.7                     | 203.6                        |                   |                 | 1001.1                    | 482.5                        | 316                        | 400.6                         |
| 8        | 1289                     | 588                         | 322                       | 254                          |                   |                 | 1243                      | 601                          | 350                        | 369                           |
| 9        | 1093.2                   | 458.6                       | 468                       | 256.7                        |                   |                 | 1093.5                    | 391.5                        | 612.3                      | 323.1                         |
| 10       |                          |                             |                           |                              |                   |                 |                           |                              |                            |                               |
| 11       |                          |                             |                           |                              |                   |                 |                           |                              |                            |                               |
| 12       | 1296.9                   | 665.2                       | 1024.8                    | 755.3                        |                   |                 | 1392.6                    | 808                          | 790.4                      | 345.7                         |
| 13       | 1317                     | 803                         | 731                       | 803                          | 586               | 495             |                           |                              |                            |                               |
| 14       | 1143                     | 540                         | 997                       | 540                          | 146               | 510             |                           |                              |                            |                               |
| 15       |                          |                             |                           |                              |                   |                 |                           |                              |                            |                               |
| 16       |                          |                             |                           |                              |                   |                 |                           |                              |                            |                               |

LEDD: levodopa equivalent daily dose  
SD: standard deviation

**eTable 3. Case report data**

| ID study | Study          | Year | Genes                 | Gene type | Target | Follow-up (months) | Presurgical UPDRS-III mutated | Postsurgical UPDRS-III mutated | Presurgical LEDD mutated | Postsurgical LEDD mutated |
|----------|----------------|------|-----------------------|-----------|--------|--------------------|-------------------------------|--------------------------------|--------------------------|---------------------------|
| 1        | Capecchi et al | 2004 | PARKIN (homozygous)   | 1         | STN    | 12                 | 45                            | 7                              | 900                      | 308                       |
| 2        | Romito et al   | 2005 | PARKIN (homozygous)   | 1         | STN    | 18                 | 61                            | 35                             | 500                      | 280                       |
| 3        | Genc et al     | 2016 | PARKIN (heterozygous) | 2         | STN    |                    | 48                            | 7                              | 200                      | 100                       |
| 4        | Nakahara et al | 2014 | PARKIN + PINK1        | 3         | STN    | 8                  | 86                            | 33                             | 1181                     | 490                       |
| 5        | Breit et al    | 2010 | LRRK2                 | 4         | STN    | 12                 | 70                            | 24                             | 900                      | 500                       |
| 6        | Stefani et al  | 2012 | LRRK2                 | 4         | STN    | 3                  | 27                            | 8                              | 850                      | 360                       |
| 7        | Moro et al     | 2008 | PINK1                 | 5         | STN    | 12                 | 35.5                          | 18.99                          |                          |                           |
| 8        | Antonini et al | 2012 | SNCA                  | 6         | STN    | 12                 | 22                            | 12.5                           | 1250                     | 460                       |

UPDRS-III: unified parkinson's disease rating scale part III

LEDD: levodopa equivalent daily dose



**eTable 4. Meta-analysis output**

| ID study | Gene | Number of studies | I2   | Absolute Effect | Confidence interval (lower) | Confidence interval (upper) | p-value | Percent Improvement | Group | Method |
|----------|------|-------------------|------|-----------------|-----------------------------|-----------------------------|---------|---------------------|-------|--------|
| 1        | 1    | 4                 | 72.6 | 24.13           | 12.37                       | 35.89                       | <0.001  | 43                  | 1     | D-L    |
| 1        | 1    |                   |      | 24.13           | 4.6                         | 43.6                        | 0.03    |                     | 1     | HKSJ   |
| 2        | 2    | 5                 | 52   | 23.02           | 15.21                       | 30.83                       | <0.001  | 46                  | 1     | D-L    |
| 2        | 2    |                   |      | 23.02           | 12.2                        | 33.8                        | 0.004   |                     | 1     | HKSJ   |
| 3        | 3    | 3                 | 91.9 | 20              | 4.54                        | 35.46                       | 0.01    | 49                  | 1     | D-L    |
| 3        | 3    |                   |      | 20              | -20.4                       | 60.4                        | 0.17    |                     | 1     | HKSJ   |
| 4        | 4    | 8                 | 85.5 | 25.24           | 21.27                       | 29.22                       | <0.001  | 53                  | 1     | D-L    |
| 4        | 4    |                   |      | 25.24           | 19.5                        | 31                          | <0.001  |                     | 1     | HKSJ   |
| 1        | 1    | 3                 | 90,2 | 494.818         | -18.141                     | 1007.776                    | 0.06    | 61                  | 2     | D-L    |
| 1        | 1    |                   |      | 494.818         | -577.1                      | 1566.8                      | 0.19    |                     | 2     | HKSJ   |
| 2        | 2    | 3                 | 22   | 711.899         | 491.809                     | 931.988                     | <0.001  | 61                  | 2     | D-L    |
| 2        | 2    |                   |      | 711.899         | 227.3                       | 1196.5                      | 0.02    |                     | 2     | HKSJ   |
| 3        | 3    | 2                 | 0    | 269.16          | 226.833                     | 311.488                     | <0.001  | 22                  | 2     | D-L    |
| 3        | 3    |                   |      | 269.16          | 27.4                        | 510.9                       | 0.04    |                     | 2     | HKSJ   |
| 4        | 4    | 7                 | 78.2 | 681.76          | 544.4                       | 819.12                      | <0.001  | 55                  | 2     | D-L    |
| 4        | 4    |                   |      | 681.76          | 539.8                       | 823.7                       | <0.001  |                     | 2     | HKSJ   |

D-L: DerSimonian-Laird method

HKSJ: Hartung-Knapp-Sidik-Jonkman method

**eTable 5. Motor levodopa response**

| ID study | Study             | Unique study | Year | Study type | Genes                           | Gene type | Target        | Genes studied | Presurgical UPDRS-III mutated OFF levodopa | Presurgical UPDRS-III SD mutated OFF levodopa | Presurgical UPDRS-III mutated ON levodopa | Presurgical UPDRS-III SD mutated ON levodopa | Number of controls | Presurgical UPDRS-III controls OFF levodopa | Presurgical UPDRS-III SD controls OFF levodopa | Presurgical UPDRS-III controls ON levodopa | Presurgical UPDRS-III SD controls ON levodopa |
|----------|-------------------|--------------|------|------------|---------------------------------|-----------|---------------|---------------|--------------------------------------------|-----------------------------------------------|-------------------------------------------|----------------------------------------------|--------------------|---------------------------------------------|------------------------------------------------|--------------------------------------------|-----------------------------------------------|
| 1        | Moro et al (a)    | 1            | 2008 | Cohort     | PARKIN (homozygous only)        | 1         | STN           | 6             | 49.2                                       | 13.4                                          | 21.3                                      | 4.4                                          | 68                 | 48.7                                        | 13.1                                           | 18.6                                       | 10.2                                          |
| 2        | Moro et al (b)    |              | 2008 | Cohort     | PARKIN (heterozygous only)      | 2         | STN           | 5             | 50                                         | 9.1                                           | 14.3                                      | 10.4                                         |                    |                                             |                                                |                                            |                                               |
| 3        | Angeli et al (a)  | 1            | 2013 | Cohort     | PARKIN (homozygous), GBA, LRRK2 | 1         | STN, Gpi, Vim |               |                                            |                                               |                                           |                                              |                    |                                             |                                                |                                            |                                               |
| 4        | Romito et al      | 1            | 2005 | Cohort     | PARKIN (heterozygous only)      | 2         | STN           | 4             | 57                                         | 10.55                                         | 22.7                                      | 8.4                                          | 31                 | 59.7                                        | 11.3                                           | 24.5                                       | 14.2                                          |
| 5        | Lohmann et al (a) | 1            | 2008 | Cohort     | PARKIN (homozygous)             | 1         | STN           | 7             | 55.4                                       | 17.3                                          | 14.5                                      | 10                                           | 39                 | 51.9                                        | 18.3                                           | 11.2                                       | 8.5                                           |
| 6        | Lohmann et al (b) |              | 2008 | Cohort     | PARKIN (heterozygous)           | 2         | STN           | 7             | 54.3                                       | 13.9                                          | 11.6                                      | 12.7                                         |                    |                                             |                                                |                                            |                                               |
| 7        | Kim et al         | 1            | 2014 | Cohort     | PARKIN (homozygous)             | 1         | STN           | 3             | 49.8                                       | 24.5                                          | 18.3                                      | 7.8                                          | 9                  | 38.3                                        | 10.6                                           | 17.7                                       | 12.6                                          |
| 8        | Schupbac          | 1            | 2007 | Cohort     | LRRK2                           | 3         | STN           | 9             | 41.4                                       | 12.4                                          | 8.2                                       | 4.6                                          | 60                 | 43.4                                        | 17                                             | 10.5                                       | 9.2                                           |

|    |                     |   |      |              |                                 |   |               |    |      |      |      |      |    |      |      |      |      |
|----|---------------------|---|------|--------------|---------------------------------|---|---------------|----|------|------|------|------|----|------|------|------|------|
|    | h et al             |   |      |              |                                 |   |               |    |      |      |      |      |    |      |      |      |      |
| 9  | Greenbaum et al     | 1 | 2013 | Case-Control | LRRK2                           | 3 | STN           | 13 | 42.5 | 11.8 | 19.5 | 13   | 26 | 43.3 | 12.3 | 23.6 | 13.2 |
| 10 | Sayad et al (a)     | 1 | 2016 | Cohort       | LRRK2                           | 3 | STN           | 15 | 55.8 | 16.4 | 25   | 13.2 | 10 | 51.7 | 14.4 | 30.6 | 16.7 |
| 11 | Sayad et al (b)     |   | 2016 | Cohort       | PARKIN (heterozygous)           | 2 | STN           | 2  | 47.5 | 2.1  | 30   | 2.8  |    |      |      |      |      |
| 12 | Lythe et al         | 1 | 2017 | Case-Control | GBA                             | 4 | STN, Gpi      | 17 | 52.4 | 13   | 18.4 | 14.9 | 17 | 40.5 | 12   | 12.6 | 7.4  |
| 13 | Angeli et al (b)    |   | 2013 | Cohort       | PARKIN (homozygous), GBA, LRRK2 | 3 | STN, Gpi, Vim |    |      |      |      |      |    |      |      |      |      |
| 14 | Angeli et al (c)    |   | 2013 | Cohort       | PARKIN (homozygous), GBA, LRRK2 | 4 | STN, Gpi, Vim |    |      |      |      |      |    |      |      |      |      |
| 15 | Gomez-Esteban et al | 1 | 2006 | Case-control | LRRK2                           | 3 | STN           | 4  | 48.5 | 18.5 | 18   | 7.4  |    |      |      |      |      |
| 16 | Weiss et al         | 1 | 2012 | Case-Control | GBA                             | 4 | STN           | 3  | 39.5 | 19.1 | 16.5 | 3.5  | 6  | 46.2 | 11.8 | 18.3 | 7.1  |

UPDRS-III: unified parkinson's disease rating scale part III  
SD: standard deviation

**eTable 6. Heterozygous PRKN analysis**

| META-ANALYSES                                   |                                            |                                                 |                                                             |                                        |              |                                   |                     |
|-------------------------------------------------|--------------------------------------------|-------------------------------------------------|-------------------------------------------------------------|----------------------------------------|--------------|-----------------------------------|---------------------|
| Age at PD onset (years; mean ± SD)              | Disease duration at DBS (years; mean ± SD) | UPDRS-III improvement after STN DBS [95%CI] (%) | p-value UPDRS-III                                           | LEDD changes after STN DBS [95%CI] (%) | p-value LEDD |                                   |                     |
| 38.4 ± 6.8                                      | 14.0 ± 2.0                                 | 20.5 [-2.2 - 43.3] (41%)                        | 0.077                                                       | -921.2 [652.8 - 1189.7] (76%)          | < 0.001      |                                   |                     |
| VALIDATION ANALYSES                             |                                            |                                                 |                                                             |                                        |              |                                   |                     |
| N                                               | I2                                         | Pooled Mean change                              | 95%CI                                                       |                                        | p-value      | Baseline                          | Percent Improvement |
| <i>UPDRS-III - Validation analysis #1</i>       |                                            |                                                 |                                                             |                                        |              |                                   |                     |
| 4                                               | 96.6%                                      | 21.2                                            | -0.97                                                       | 43.3                                   | 0.061        | 50.1                              | 42                  |
| <i>UPDRS-III - Validation analysis #2</i>       |                                            |                                                 |                                                             |                                        |              |                                   |                     |
| 4                                               | 95.7%                                      | 21.1                                            | -1.3                                                        | 43.4                                   | 0.065        | 50.1                              | 42                  |
| <i>LEDD - Validation analysis #1</i>            |                                            |                                                 |                                                             |                                        |              |                                   |                     |
| 2                                               | 55.1%                                      | 924.0                                           | 655.1                                                       | 1192.8                                 | <0.001       | 1214.4                            | 76                  |
| <i>LEDD - Validation analysis #2</i>            |                                            |                                                 |                                                             |                                        |              |                                   |                     |
| 2                                               | 41.5%                                      | 925.2                                           | 656.2                                                       | 1194.1                                 | <0.001       | 1214.4                            | 76                  |
| CASE REPORT - INTRA-INDIVIDUAL PATIENT ANALYSES |                                            |                                                 |                                                             |                                        |              |                                   |                     |
| Number of case reports                          |                                            | Mean baseline values                            | Mean improvement                                            |                                        |              | Percent improvement               |                     |
| <i>Motor improvement (UPDRS-III score)</i>      |                                            |                                                 |                                                             |                                        |              |                                   |                     |
| 1                                               |                                            | 48                                              | 41                                                          |                                        |              | 85%                               |                     |
| <i>LEDD reduction (mg)</i>                      |                                            |                                                 |                                                             |                                        |              |                                   |                     |
| 1                                               |                                            | 200                                             | 100                                                         |                                        |              | 50%                               |                     |
| Proportion and type of mutations                |                                            |                                                 |                                                             |                                        |              |                                   |                     |
| Proportion of mutated patients (95% CI)         |                                            |                                                 | Type of mutation                                            |                                        |              | Study                             |                     |
| 9% (5%-12%)                                     |                                            |                                                 | AG 202–203del; C1101T; G535A; ex1dupl                       |                                        |              | Romito et al. 2005 <sup>28</sup>  |                     |
|                                                 |                                            |                                                 | E207fsX235; A206_E207ins28aa; R256C; R402P; G179?           |                                        |              | Moro et al. 2008 <sup>23</sup>    |                     |
|                                                 |                                            |                                                 | R256C (2 patients); ex6dupl; ex6del; A398T; ex7dupl; ex3del |                                        |              | Lohmann et al. 2008 <sup>25</sup> |                     |
|                                                 |                                            |                                                 | c.1000C>T; c.337_376del; c.1310C>T                          |                                        |              | Angeli et al. 2013 <sup>24</sup>  |                     |
|                                                 |                                            |                                                 | NR (2 patients)                                             |                                        |              | Kim et al. 2014 <sup>26</sup>     |                     |
|                                                 |                                            |                                                 | c.458C>G; c.1204C>T                                         |                                        |              | Sayad et al. 2016 <sup>29</sup>   |                     |
|                                                 |                                            |                                                 | c.89G>A                                                     |                                        |              | Genc et al. 2016 <sup>30</sup>    |                     |

LEDD: Levodopa Equivalent Daily Dose; PD: Parkinson Disease; UPDRS: Unified Parkinson’s Disease Rating Scale; CI: confidence interval

Motor improvement was defined as the change in the UPDRS-III score between the presurgical Medication-OFF condition and the postsurgical Medication-OFF/Stimulation-ON condition.

In the validation analyses, meta-analyses using random effects model with DerSimonian & Laird method were conducted for each outcome using the pooled standard deviation, computed after estimating the correlation coefficient between pre and post values for all datasets (Validation analysis #1) and ignoring the correlation between pre and post values (Validation analysis #2).

**eTable 7. Validation analyses for UPDRS-III improvement and LEDD reduction**

|                                         | N | I2     | Pooled Mean change | 95%CI |        | p-value | Baseline | Percent Improvement |
|-----------------------------------------|---|--------|--------------------|-------|--------|---------|----------|---------------------|
| <i>UPDRS-III Validation analysis #1</i> |   |        |                    |       |        |         |          |                     |
| <i>PRKN</i>                             | 4 | 68.3 % | 24.0               | 12.3  | 35.7   | <0.001  | 56.5     | 42                  |
| <i>LRRK 2</i>                           | 5 | 46.4 % | 22.9               | 15.1  | 30.7   | <0.001  | 49.9     | 46                  |
| <i>GBA</i>                              | 3 | 88.5 % | 20.1               | 3.95  | 36.1   | 0.015   | 40.5     | 50                  |
| <i>UPDRS-III Validation analysis #2</i> |   |        |                    |       |        |         |          |                     |
| <i>PRKN</i>                             | 4 | 59.6 % | 23.8               | 12.3  | 35.2   | <0.001  | 56.5     | 42                  |
| <i>LRRK 2</i>                           | 5 | 30.3 % | 22.5               | 15.0  | 30.1   | <0.001  | 49.9     | 45                  |
| <i>GBA</i>                              | 3 | 85.8 % | 20.1               | 3.7   | 36.5   | 0.016   | 40.5     | 50                  |
| <i>LEDD Validation analysis #1</i>      |   |        |                    |       |        |         |          |                     |
| <i>PRKN</i>                             | 3 | 89.4 % | 495.0              | -18.4 | 1008.5 | 0.059   | 813.7    | 61                  |
| <i>LRRK 2</i>                           | 3 | 24.2 % | 713.2              | 492.1 | 934.3  | <0.001  | 1164.7   | 61                  |
| <i>GBA</i>                              | 2 | 0.0%   | 187.2              | -40.4 | 414.7  | 0.107   | 1214.2   | 15                  |
| <i>LEDD Validation analysis #2</i>      |   |        |                    |       |        |         |          |                     |
| <i>PRKN</i>                             | 3 | 86.1 % | 496.1              | -19.8 | 1011.9 | 0.059   | 813.7    | 61                  |
| <i>LRRK 2</i>                           | 3 | 4.4%   | 701.6              | 488.2 | 914.9  | <0.001  | 1164.7   | 60                  |

CI: confidence interval

In the validation analyses, meta-analyses using random effects model with DerSimonian & Laird method were conducted for each outcome using the pooled standard deviation, computed after estimating the correlation coefficient between pre and post values for all datasets (Validation analysis #1) and ignoring the correlation between pre and post values (Validation analysis #2).

**eTable 8. Pre STN DBS motor outcome (UPDRS-III score) associated with levodopa - Meta-analysis**

| <b>Genes</b>                    | <b>Number of studies</b> | <b>I<sup>2</sup></b> | <b>Pooled Mean change</b> | <b>95%CI</b> |      | <b>p-value</b> | <b>Baseline</b> | <b>Percent Improvement</b> |
|---------------------------------|--------------------------|----------------------|---------------------------|--------------|------|----------------|-----------------|----------------------------|
| <i><b>PRKN</b></i>              | 3                        | 0.0%                 | 32.2                      | 21.2         | 43.1 | <0.001         | 51.6            | 62                         |
| <i><b>LRRK2</b></i>             | 4                        | 67.1%                | 28.9                      | 23.5         | 34.3 | <0.001         | 46.6            | 62                         |
| <i><b>GBA</b></i>               | 2                        | 32.8%                | 32.2                      | 24.2         | 40.2 | <0.001         | 50.3            | 64                         |
| <i><b>Heterozygous PRKN</b></i> | 4                        | 79.2%                | 31.3                      | 17.9         | 44.7 | <0.001         | 50.1            | 62                         |
| <i><b>Controls</b></i>          | 9                        | 82.6%                | 29.1                      | 24.8         | 33.3 | <0.001         | 44.9            | 64                         |

CI: confidence interval

**eTable 9. Pre STN DBS motor outcome (UPDRS-III score) associated with levodopa - Intra-individual patient analysis**

| <b>Genes</b>             | <b>Number of case reports</b> | <b>Mean change (standard deviation)</b> | <b>Percent improvement</b> |
|--------------------------|-------------------------------|-----------------------------------------|----------------------------|
| <i>PRKN</i>              | 2                             | 39.0 (1.4)                              | 76                         |
| <i>LRRK2</i>             | 2                             | 27.0 (16.9)                             | 56                         |
| <i>PINK1</i>             | 1                             | 19.5                                    | 55                         |
| <i>SNCA</i>              | 1                             | 18.0                                    | 64                         |
| <i>PRKN+PINK1</i>        | 1                             | 61.0                                    | 71                         |
| <i>Heterozygous PRKN</i> | 1                             | 41.0                                    | 85                         |



## eAppendix 1. Statistical codes

```
clear
*****eTable 1 and Table 2 analysis*****
import excel using datafile.xlsx, sheet("Meta-analysis for proportion") ///
firstrow
foreach var in mutation Parkinho Parkinhe LRRK2 GBA {
metaprop `var' screened, random
}
***generating pooled standard error and meta-analysis using D-L and HKSJ methods for motor score***
clear
import excel using datafile.xlsx, sheet("Meta-analysis data") ///
firstrow clear
foreach var in ms ledd {
gen meanchange_case_`var'= pre_`var'_case-post_`var'_case
forval i=1/4 {
corr pre_`var'_case post_`var'_case if genetype==`i'
gen r_`var'_case`i'=r(rho)
gen se_`var'_case`i'= sqrt((sd_pre_`var'_case^2 + sd_post_`var'_case^2 -
2*r_`var'_case`i'*sd_pre_`var'_case*sd_post_`var'_case)/no_genes_studied) if genetype==`i'
metan meanchange_case_`var' se_`var'_case`i' if genetype==`i', sortby(year) lcols(study year) effect("Mean Change")
random
}
}

replace meanchange_case_ledd=meanchangedleddcase if id==3 | id==14 | id==13
replace se_ledd_case1=sdchangedleddcase/sqrt(no_genes_studied) if id==3 & genetype==1
replace se_ledd_case2=sdchangedleddcase/sqrt(no_genes_studied) if id==3 & genetype==1
replace se_ledd_case3=sdchangedleddcase/sqrt(no_genes_studied) if id==13 & genetype==3
replace se_ledd_case4=sdchangedleddcase/sqrt(no_genes_studied) if id==14 & genetype==4

forval i=1/4 {
metan meanchange_case_ms se_ms_case`i' if genetype==`i', random rfdist
replace _WT=. if _WT==0
gen ymean=r(ES)
gen df=r(df)
gen y=meanchange_case_`var' if genetype==`i'
gen y2= (y-ymean)^2 if genetype==`i'
gen y2w= y2*_WT if genetype==`i'
sum y2w if genetype==`i'
matrix hksj= r(sum)
gen hksj1=hksj[1,1]/100
gen hksj2= sqrt(hksj1/df)
gen ll= ymean-invtail(df,0.025)*hksj2
gen ul= ymean+invtail(df,0.025)*hksj2
gen t=ymean/hksj2
gen p=2*ttail(df, t)
sum ll ul p if genetype==`i'
drop ymean df y y2 y2w hksj1 hksj2 t ll ul p
}

forval i=1/4 {
metan meanchange_case_ledd se_ledd_case`i' if genetype==`i' & meanchange_case_ledd !=. , random
replace _WT=. if _WT==0
gen ymean=r(ES)
gen df=r(df)
gen y=meanchange_case_ledd if genetype==`i'
gen y2= (y-ymean)^2 if genetype==`i'
gen y2w= y2*_WT if genetype==`i'
sum y2w if genetype==`i'
```

```

matrix hksj= r(sum)
gen hksj1=hksj[1,1]/100
gen hksj2= sqrt(hksj1/df)
gen ll= ymean-invttail(df,0.025)*hksj2
gen ul= ymean+invttail(df,0.025)*hksj2
gen t=ymean/hksj2
gen p=2*ttail(df, t)
sum ll ul p if genetype==`i'
drop ymean df y y2 y2w hksj1 hksj2 t ll ul p
}

```

**\*\*generating pooled standard error and meta-analysis using D-L and HKSJ methods for motor score and ledd in control\*\***

```

foreach var in ms ledd {
gen meanchange_con_`var`=pre_`var'_con-post_`var'_con
corr pre_`var'_con post_`var'_con
gen r_`var'_con=r(rho)
gen se_`var'_con= sqrt((sd_pre_`var'_con^2 + sd_post_`var'_con^2 -
2*r_`var'_con*sd_pre_`var'_con*sd_post_`var'_con)/no_control)
metan meanchange_con_`var' se_`var'_con , sortby(year) lcols(study year) effect("Mean Change") random
}

```

```

foreach var in ms ledd {
metan meanchange_con_`var' se_`var'_con , random rfdist
replace _WT=. if _WT==0
gen ymean=r(ES)
gen df=r(df)
gen y=meanchange_con_`var'
gen y2= (y-ymean)^2
gen y2w= y2*_WT
sum y2w
matrix hksj= r(sum)
gen hksj1=hksj[1,1]/100
gen hksj2= sqrt(hksj1/df)
gen ll= ymean-invttail(df,0.025)*hksj2
gen ul= ymean+invttail(df,0.025)*hksj2
gen t=ymean/hksj2
gen p=2*ttail(df, t)
sum ll ul p
drop ymean df y y2 y2w hksj1 hksj2 t ll ul p
}

```

**\*\*\*\*\*Validation analysis \*\*\*\*\***

```

foreach var in ms ledd {
corr pre_`var'_case post_`var'_case
gen r_`var'_case_p=r(rho)
gen se_`var'_case_p= sqrt((sd_pre_`var'_case^2 + sd_post_`var'_case^2 -
2*r_`var'_case_p*sd_pre_`var'_case*sd_post_`var'_case)/no_genes_studied)
gen se_`var'_case_a= sqrt((sd_pre_`var'_case^2 + sd_post_`var'_case^2)/no_genes_studied)
metan meanchange_case_`var' se_`var'_case_p , by(genetype) sortby(year) lcols(study year) effect("Mean Change")
random
metan meanchange_case_`var' se_`var'_case_a , by(genetype) sortby(year) lcols(study year) effect("Mean Change")
random
}
replace meanchange_case_ledd=meanchangedleddcase if id==3 | id==14 | id==13
replace se_ledd_case_p=sdchangedleddcase/sqrt(no_genes_studied) if id==3 & genetype==1
replace se_ledd_case_p=sdchangedleddcase/sqrt(no_genes_studied) if id==3 & genetype==1
replace se_ledd_case_p=sdchangedleddcase/sqrt(no_genes_studied) if id==13 & genetype==3
replace se_ledd_case_p=sdchangedleddcase/sqrt(no_genes_studied) if id==14 & genetype==4
replace meanchange_case_ledd=meanchangedleddcase if id==3 | id==14 | id==13
replace se_ledd_case_a=sdchangedleddcase/sqrt(no_genes_studied) if id==3 & genetype==1

```

```

replace se_ledd_case_a=sdchangedleddcase/sqrt(no_genes_studied) if id==3 & genotype==1
replace se_ledd_case_a=sdchangedleddcase/sqrt(no_genes_studied) if id==13 & genotype==3
replace se_ledd_case_a=sdchangedleddcase/sqrt(no_genes_studied) if id==14 & genotype==4

```

```

metan meanchange_case_ledd se_ledd_case_p , by(genotype) sortby(year) lcols(study year) effect("Mean Change")
random
metan meanchange_case_ledd se_ledd_case_a , by(genotype) sortby(year) lcols(study year) effect("Mean Change")
random

```

\*\*\*\*\*Meta-analysis for pre-scores for computing percent relative change\*\*\*\*\*

```

foreach var in ms ledd {
gen se_pre_`var'_case =sd_pre_`var'_case/sqrt(no_genes_studied)
metan pre_`var'_case se_pre_`var'_case , by(genotype) sortby(year) lcols(study year) effect("Mean Change") random
}

```

\*\*\*\*\*Forest Plot Graph (Figure 2)\*\*\*\*\*

```

clear
import excel using datafile.xlsx , sheet("graph") ///
firstrow
format I2 %9.1fc
label variable I2 "I-square(%)"
label define Gene1 1 "PRKN" 2 "LRRK2" 3 "GBA" 4 "Control"
label values Gene Gene1
admetan AbsoluteEffect LL UL if Group==1 , study(Method) by(Gene) sortby(Method) nosubgroup nowt nooverall ///
rcols( N I2 pvalue Improvement) effect("Mean Change") forestplot (xlabel (-65 -45 -25 0 25 45 65) title("Pre-Post
Mean Changes in UPDRS-III", position(6) size(moderate) ) scheme(s1color) ///
boxopts( msymbol(0) mcolor(white) )
graph export " datafile.xlsx \Figure2UPDRSf.wmf" , replace

```

```

admetan AbsoluteEffect LL UL if Group==2 , study(Method) by(Gene) sortby(Method) nosubgroup nowt nooverall ///
rcols( N I2 pvalue Improvement) effect("Mean Change") forestplot (xlabel (-1800 -1200 -600 0 600 1200 1800)
title("Pre-Post Mean Changes in LEDD", position(6) size(moderate) ) scheme(s1color) ///
boxopts( msymbol(0) mcolor(white) )
graph export "datafile.xlsx \Figure2leddf.wmf" , replace

```

\*\*\*\*\* meta-analysis using D-L for motor score (pre-surgery)\*\*\*\*\*

```

clear
import excel using datafile.xlsx, sheet("Levodopa ") ///
firstrow clear
foreach var in ms {
gen meanchange_case_`var' = pre_`var'_case-post_`var'_case
forval i=1/4 {
corr pre_`var'_case post_`var'_case if genotype==`i'
gen r_`var'_case`i'=r(rho)
gen se_`var'_case`i'= sqrt((sd_pre_`var'_case^2 + sd_post_`var'_case^2 -
2*r_`var'_case`i'*sd_pre_`var'_case*sd_post_`var'_case)/no_genes_studied) if genotype==`i'
metan meanchange_case_`var' se_`var'_case`i' if genotype==`i' , sortby(year) lcols(study year) effect("Mean Change")
random
}
}

```

```

foreach var in ms {
gen meanchange_con_`var' = pre_`var'_con - post_`var'_con
corr pre_`var'_con post_`var'_con
gen r_`var'_con = r(rho)
gen se_`var'_con = sqrt((sd_pre_`var'_con^2 + sd_post_`var'_con^2 -
2*r_`var'_con*sd_pre_`var'_con*sd_post_`var'_con)/no_control)
metan meanchange_con_`var' se_`var'_con , sortby(year) lcols(study year) effect("Mean Change") random
}

```

```

foreach var in ms {
gen se_pre_`var'_case =sd_pre_`var'_case/sqrt(no_genes_studied)
metan pre_`var'_case se_pre_`var'_case , by(genotype) sortby(year) lcols(study year) effect("Mean Change") random
}

```

```

gen se_pre_`var'_con =sd_pre_`var'_con/sqrt(no_genes_studied)
metan pre_`var'_con se_pre_`var'_con , sortby(year) lcols(study year) effect("Mean Change") random
}

*****Analysis of case reports*****
clear
import excel using datafile.xlsx, sheet("case-report data") ///
firstrow clear

foreach var in ms ledd {
gen change_case_`var'= pre_`var'_case-post_`var'_case
gen pchange_case_`var'= (pre_`var'_case-post_`var'_case)/pre_`var'_case
}
gen change_ms_lev= pre_ms_lev-post_ms_lev
gen pchange_ms_lev= (pre_ms_lev-post_ms_lev)/pre_ms_lev
tabstat change_case_ms change_case_ledd pchange_case_ms pchange_case_ledd change_ms_lev pchange_ms_lev,
by(genotype) stats (mean sd)

```

## eAppendix 2. Methods of data analysis

1. The data collection form provides the list of variables and their labels.
2. The excel datasheet (sheet 1: data for conducting meta-analysis of proportions, sheet 2 data for conducting meta-analysis of different outcomes, sheet 3: data for conducting analysis of case reports, sheet 4: data for producing forest plots) includes all data extracted from each article.
3. From each study, number of specific genes and total number of patients screened for any genes were extracted and included in excel datasheet 1. This database was used for estimating proportion of each specific gene mutation using meta-analysis. The statistical codes are also provided for conducting meta-analysis for estimating pooled proportions (see statistical codes file).
4. Wherever the study reported mean change and standard deviation of mean change, we used reported mean change and standard deviation of mean change in meta-analysis instead of pooled standard deviation obtained from standard deviation of each group.
5. Pearson's correlation coefficients between pre and post-intervention scores were computed for each outcome score separately for each gene ( $r_k$  where  $k$  is the specific gene group). The pooled standard deviation (PSD) was computed using standard deviation for pre-intervention score ( $SD_1$ ), standard deviation for post-intervention score ( $SD_2$ ) and  $r_k$  with formula  $\sqrt{SD_1^2 + SD_2^2 - 2 * r_k * SD_1 * SD_2}$ , and pooled standard error (PSE) was obtained using  $\sqrt{SD_1^2 + SD_2^2 - 2 * r_k * SD_1 * SD_2 / n}$ , where  $n$  is the number studies.
6. In the validation meta-analysis 1, the PSD was computed using  $\sqrt{SD_1^2 + SD_2^2 - 2 * r * SD_1 * SD_2}$ , and pooled standard error (PSE) was obtained using  $\sqrt{SD_1^2 + SD_2^2 - 2 * r * SD_1 * SD_2 / n}$ , where  $r$  is the Pearson's correlation coefficient between pre and post-intervention scores irrespective of gene mutations. In the validation meta-analysis 2, the PSD was computed using  $\sqrt{SD_1^2 + SD_2^2}$ , and pooled standard error (PSE) was obtained using  $\sqrt{SD_1^2 + SD_2^2 / n}$ .
7. Number of screened patients and number of specific genes were used to compute pooled proportion of specific gene mutation while mean change in outcome score along with PSE was used to compute pooled mean change in each outcome. In addition, meta-analysis was conducted to estimate the pooled pre-intervention score for each outcome to obtain percent relative change in each outcome after intervention separately for each gene. The DerSimonian-Laird (D-L) method of meta-analysis of proportions and baseline outcome scores were carried out while Hartung-Knapp-Sidik-Jonkman (HKSJ) method for random effects meta-analysis was conducted for outcome scores. In addition, D-L method was also applied for estimating pooled effect of intervention on each outcome for each specific gene separately. In validation meta-analysis for outcome scores, D-L method was used to compute pooled effects after estimating the correlation coefficient between pre and post values for all datasets (irrespective of gene mutations) and ignoring the correlation between pre and post values. We reported the number of studies included in each analysis,  $I^2$  statistic value, pooled mean change or proportion, 95% confidence interval, p-value, and percent relative change from each outcome analysis.
